# Supplementary material
Source: PubMed Central journal article supplement (PMC4098824)
Supplement: supp_WNL.0b013e31826d5ec0_efficacy_of_anti_epileptic.pdf [file supp_WNL.0b013e31826d5ec0_efficacy_of_anti_epileptic.pdf]

## Efficacy of antiepileptic drugs in adults predicts efficacy in children: A systematic review

مراجعة فعالية الأدوية المضادة للصرع عند البالغين تنبئ بفعاليتها عند الأطفال منهجية

[ **الهدف من الدراسة:** نظرا للتحديات الكامنة في أداء التجارب السريرية لدى الأطفال تم إجراء استعراض منهجي للتجارب السريرية التي تم نشرها لتحديد إمكانية استخدام فعالية الأدوية المضادة للصرع عند البالغين لتوقع فعاليتها عند الأطفال

**طرق الدراسة:** تم اعتماد Medline/PubMed, EMBASE, و مكتبة Cochrane ما بين 1970 ويناير 2010 ) لتجميع التجارب السريرية التي أجريت علي النوبات الصرعية الجزئية و النوبات الصرعية الكلية الابتدائية عند البالغين, الأطفال اقل من سنتين و ما بين 2-18 سنة. استخدم علماء الوبائيات المستقلون البحث الموحد و معايير تقييم الدراسة لتحديد التجارب المؤهلة و استخدمت Forest plots للتحقيق في القوة النسبية لمقاييس التأثير الوهمي المطروح.

**نتائج الدراسة:** من بين 30 تجربة للعلاج المساعد عند البالغين و الأطفال (2-18 سنوات) و التي جمعت معايير التقييم, كانت مقاييس التأثير بين البالغين و الأطفال لكل من جابابنتين, اموتريجين, ليفيتيراسيتام, اوكساكاربامازيبين, وتوبراميت ثابتة. كان لنسبة متوسط الوهم المطروح لنقص عدد النوبات بين خط الأساس وفترات العلاج (تتراوح بين 7.0% إلى 58.6% عند الكبار و 10.5% إلى 31.2% عند الأطفال) قيمة إحصائية كبيرة ل 46/40 و 6/6 من مجموعات العلاج التي تم دراستها. وكان معدل الاستجابة  $\geq 50\%$  (تتراوح بين 2.0% إلى 43.0% بين البالغين و 3.0% إلى 26.0% في الأطفال) ذو قيمة احصائية كبيرة ل 43/37 و 8/5 من مجموعات العلاج . عند الأطفال اقل من سنتين, كان هناك عدد غير كافي من التجارب المؤهلة للتحليل.

**الاستنتاجات:** هذه المراجعة المنهجية تدعم استقراء نتائج الفعالية عند البالغين لتوقع استجابة علاجية مرافقة مماثلة عند الأطفال من سنتين إلى 18 سنة ممن يعانون من نوبات الصرع الجزئية.

**Objective:** Due to the challenges inherent in performing clinical trials in children, a systematic review of published clinical trials was performed to determine whether the efficacy of antiepileptic drugs (AEDs) in adults can be used to predict the efficacy of AEDs in the pediatric population.

**Methods:** Medline/PubMed, EMBASE, and Cochrane library searches (1970–January 2010) were conducted for clinical trials of partial-onset seizures (POS) and primary generalized tonic-clonic

seizures (PGTCS) in adults and in children <2 and 2–18 years. Independent epidemiologists used standardized search and study evaluation criteria to select eligible trials. Forest plots were used to investigate the relative strength of placebo–subtracted effect measures.

**Results:** Among 30 adjunctive therapy POS trials in adults and children (2–18 years) that met evaluation criteria, effect measures were consistent between adults and children for gabapentin, lamotrigine, levetiracetam, oxcarbazepine, and topiramate. Placebo–subtracted median percent seizure reduction between baseline and treatment periods (ranging from 7.0% to 58.6% in adults and from 10.5% to 31.2% in children) was significant for 40/46 and 6/6 of the treatment groups studied. The  $\geq 50\%$  responder rate (ranging from 2.0% to 43.0% in adults and from 3.0% to 26.0% in children) was significant for 37/43 and 5/8 treatment groups. In children <2 years, an insufficient number of trials were eligible for analysis.

**Conclusions:** This systematic review supports the extrapolation of efficacy results in adults to predict a similar adjunctive treatment response in 2– to 18–year–old children with POS.

---

**Translator:** Wessam Fathy MD, Mansoura Medical School, Neurology, Mansoura, Egypt  
**Translation Reviewer:** Latifa Boukarrou MD, Louisiana State University Health Science Center, Neurology, Shreveport, LA
