# Supplementary material
Source: PubMed Central journal article supplement (PMC4098824)

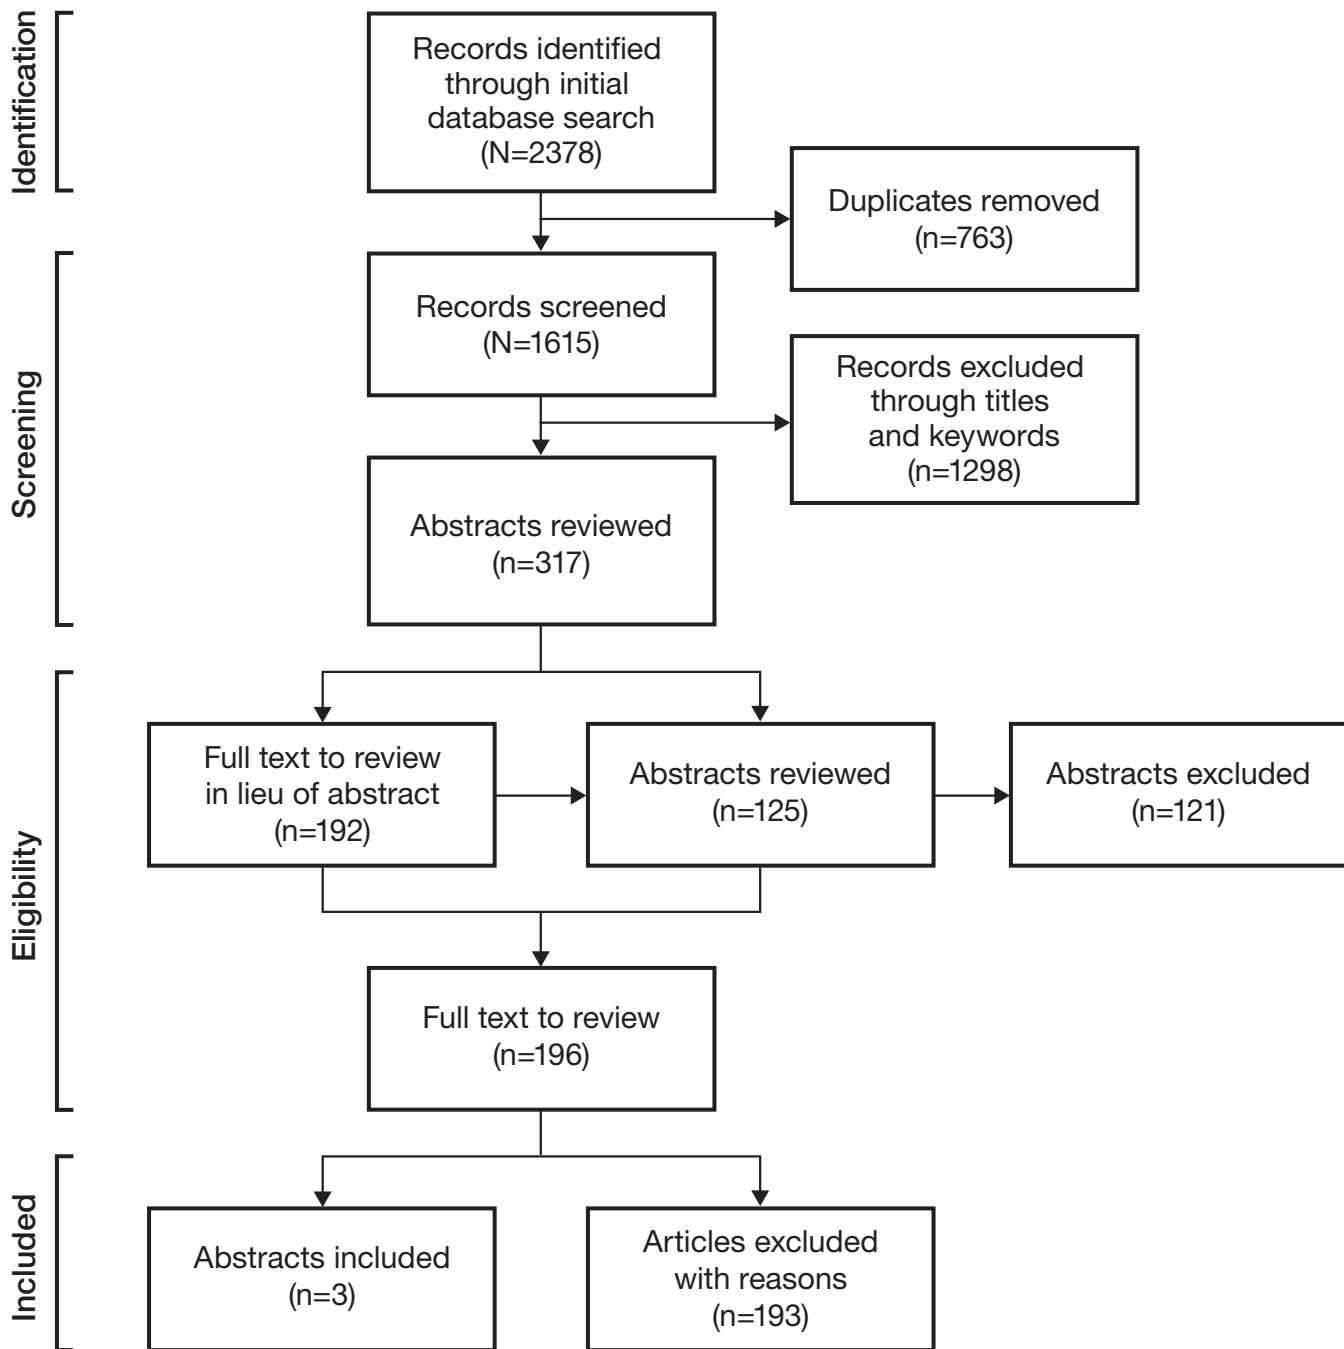

Supplement: supp_WNL.0b013e31826d5ec0_Figure_e-1.pdf [file supp_WNL.0b013e31826d5ec0_Figure_e-1.pdf]
